# 1 Mapping critical habitat of waterbirds 2 in the Arctic for risk management in 3 respect of IFC PS6

## 4 *AUTHORS*

5 Lammert Hilarides<sup>1\*</sup>, Tom Langendoen<sup>1</sup>, Stephan Flink<sup>1</sup>, Merijn van Leeuwen<sup>1</sup>, Bart Steen, Alexander  
6 V. Kondratyev<sup>2</sup>, Andrea Kölzsch<sup>3,4</sup>, Tomas Aarvak<sup>5</sup>, Helmut Kruckenberg<sup>6</sup>, Didier Vangeluwe<sup>7</sup>, Emil  
7 Todorov<sup>8</sup>, Anne Harrison<sup>9</sup>, Eileen Rees<sup>10</sup>, Adriaan M. Dokter<sup>11</sup>, Bart Nolet<sup>12</sup> and Taej Mundkur<sup>1</sup>

## 8 *AFFILIATIONS*

9 <sup>1</sup>Wetlands International, P.O. Box 4716700 AL Wageningen, The Netherlands

10 <sup>2</sup> *Affiliation Kondratyev*

11 <sup>3</sup> Max Planck Institute for Ornithology, Radolfzell, Germany

12 <sup>4</sup> University of Konstanz, Konstanz, Germany

13 <sup>5</sup> Norwegian Ornithological Society

14 <sup>6</sup> Institute for Wetlands and Waterbird Research (IWWR) e.V., Germany, Am Steigbügel 3, D-27283  
15 Verden (Aller), Germany

## 16 *ADDRESSES*

17 [lammert.hilarides@wetlands.org](mailto:lammert.hilarides@wetlands.org)

18 <sup>1</sup>[tom.langendoen@wetlands.org](mailto:tom.langendoen@wetlands.org), [stephan.flink@wetlands.org](mailto:stephan.flink@wetlands.org), [merijn.vanleeuwen@wetlands.org](mailto:merijn.vanleeuwen@wetlands.org),

19 [b.r.l.steen2@gmail.com](mailto:b.r.l.steen2@gmail.com), [taej.mundkur@wetlands.org](mailto:taej.mundkur@wetlands.org),

20 [akondratyev@mail.ru](mailto:akondratyev@mail.ru), [akoelzsch@orn.mpg.de](mailto:akoelzsch@orn.mpg.de),

21 [helmut.kruckenberg@blessgans.de](mailto:helmut.kruckenberg@blessgans.de), [rozenfeldbro@mail.ru](mailto:rozenfeldbro@mail.ru), [Didier.Vangeluwe@naturalsciences.be](mailto:Didier.Vangeluwe@naturalsciences.be),

22 [emil.georgiev.todorov@gmail.com](mailto:emil.georgiev.todorov@gmail.com), [anne.harrison@wwt.org.uk](mailto:anne.harrison@wwt.org.uk), [eileen.rees@wwt.org.uk](mailto:eileen.rees@wwt.org.uk),

23 [a.Dokter@nioo.knaw.nl](mailto:a.Dokter@nioo.knaw.nl), [B.Nolet@nioo.knaw.nl](mailto:B.Nolet@nioo.knaw.nl)

24

25 *RUNNING TITLE*

26 Mapping Arctic waterbird critical habitat

27 *COUNTS*

28 Word counts:

- 29 • Summary (533 words)
- 30 • Main text (# words)
- 31 • Acknowledgements (# words)
- 32 • References (# words)
- 33 • Table and figure legends (# words)

34 Number of tables: #

35 Number of figures: #

36 Number of references: #

37

## 38 SUMMARY

- 39 1. Economic development and energy exploration are increasing in the Arctic. Important  
40 breeding habitats for many waterbird species, which have previously been relatively  
41 undisturbed, are now being subjected to these anthropogenic pressures. The conservation of  
42 the habitats and the species they support is a significant challenge for sustainable  
43 development. Even if governments and corporates operating in this fragile environment are  
44 committed to sustainable development, there is little information available to avoid, mitigate  
45 and manage environmental risk and impacts. Taking a risk management perspective, we  
46 followed the International Finance Corporations' (IFC) Performance Standard 6 (PS6) criteria  
47 on Environmental and Social Sustainability and developed an approach to identify "critical  
48 habitat", as defined in IFC PS6, for waterbird species breeding in the Arctic. While the range  
49 of these waterbirds is roughly known, more accuracy is needed for proper risk assessment.
- 50 2. We have therefore gone a step further by modelling suitable habitat within these ranges.  
51 Depending on the relevance of the species for IFC PS6 and the level of certainty we  
52 separated the classes *likely* and *potential* critical habitat. We tested the approach for Russian  
53 breeding populations of five Anatidae species (White-fronted Goose *Anser albifrons*, Lesser  
54 White-fronted Goose *Anser erythropus*, Brent Goose *Branta bernicla*, Redbreasted Goose  
55 *Branta ruficollis* and Bewick's Swan *Cygnus columbianus bewicki*). *Likely* critical habitats were  
56 identified through a review of literature and available data for these waterbird species and  
57 multi-species congregations. To address the information gap for most of the Russian Arctic a  
58 species distribution modelling approach was used. The outputs of this approach were  
59 labelled as *potential* critical habitat, indicating the lower level of certainty than *likely* critical  
60 habitat.
- 61 3. Based on existing information the amount of likely critical habitat is estimated to be at least  
62 x,xxx,xxx km<sup>2</sup>. For the five Anatidae species, X,XXX,XXX km<sup>2</sup> potential critical habitat was

63 identified; 95% of these areas were outside of the area boundaries of likely critical habitat for  
64 the species.

65 4. Insufficient data in the east of the study area did affect the results, as some areas known to  
66 support breeding populations were not identified as suitable. Conversely, species'  
67 distributions may be overpredicted in other areas; It should also be recognized that the  
68 analyzed species currently have depressed populations and may therefore only utilize a  
69 proportion of suitable habitat available.

70 5. For risk assessment purposes however, it is better to predict false positives, rather than false  
71 negatives. The study indicates that there are large areas in the Arctic that are potentially  
72 important for each of the Anatidae species modelled, but are not yet recognised as key  
73 important areas. The results confirm that there is still much to learn about waterbird  
74 distribution and abundance in the Russian Arctic.

75 6. *Synthesis and applications* The critical habitat maps produced do not just provide a new  
76 source of information for the economic development sector, but provide it in a way that is  
77 relevant to the sector and directly applicable. The maps are useful for initial risk assessments  
78 of potential developments, to identify likely impacts and to consider mitigation options, in  
79 accordance with IFC PS6. Risk assessors should exercise caution and detailed surveys for any  
80 development in areas predicted to be suitable for each species should be carried out.

## 81 KEYWORDS

82 Species distribution models; International Finance Corporation; Performance standards; Risk  
83 assessment.

## 84 INTRODUCTION

85 The Arctic provides important breeding habitat for many waterbird species that occur in Europe and  
86 Africa (Wohl 2006). Until recently, the breeding habitats have been relatively undisturbed, with low  
87 human densities, especially in comparison to other parts of the waterbird species' flyways, where  
88 they compete with humans and many of their habitats have been modified or lost. However, with  
89 economic development, and oil and gas exploration, the Arctic is being subjected to increasing  
90 anthropogenic pressures that pose significant challenges for the management and conservation of  
91 Arctic habitats and the species they support (Wohl 2006).

92 The International Finance Corporation (IFC) is a member of the World Bank Group that focuses on  
93 private sector development and has a strategic commitment to sustainable development. For this,  
94 the IFC has developed eight performance standards on social and environmental sustainability;  
95 approximately 80 large corporates in the primary resource and financing sectors have adopted these  
96 standards. Of relevance to the protection of habitats and waterbirds in the Arctic, Performance  
97 Standard 6 (PS6) deals with "Biodiversity conservation and sustainable management of living natural  
98 resources" (IFC 2012a). In accordance with IFC PS6 different risk management approaches are  
99 employed to protect biodiversity and ecosystem services based on the sensitivity and values of a  
100 habitat. Thus, the identification of important habitats for waterbirds is a crucial step to inform  
101 management plans and minimise the impacts of human activities.

102 PS6 gives a definition of "critical habitat" and provides guidance on how to act when operating in or  
103 close to a critical habitat (IFC 2012b). Critical habitat is a geographic area important for biodiversity  
104 and may include: (1) habitats of significant importance to Critically Endangered and/or Endangered  
105 species (as categorized in the IUCN Red List of Threatened Species; IUCN 2015); (2) habitats of  
106 significant importance to endemic and/or restricted range species; (3) habitats that support globally  
107 significant concentrations of migratory species and/or congregatory species; (4) highly threatened  
108 and/or unique ecosystems; and/or (5) areas associated with key evolutionary processes (IFC 2012a).

109 If an area contains critical habitat, IFC PS6 requires a Biodiversity Action Plan to be developed and  
110 implemented (IFC 2012a). However, business developers rely on existing species distribution,  
111 biodiversity and protected areas data sets, because there is no global map of critical habitat. While  
112 some of the existing data sets are good indicators of critical habitat and use criteria that overlap with  
113 those used by the IFC (Martin *et al.* 2015), the data are generally incomplete or require  
114 interpretation under the IFC guidelines. As a result, there are many areas of critical habitat for  
115 species, ecosystems and evolutionary processes that have not yet been identified, particularly in the  
116 Arctic. Only few robust, long-term monitoring programmes are in action or openly available here,  
117 even for waterbirds, one of the most intensely studied animal groups in the world.

118 In this study, we propose a new methodology to identify critical waterbird habitat in the Arctic,  
119 based on PS6 criteria. We focused on areas covered by both the Conservation of Arctic Flora and  
120 Fauna (CAFF) working group and the African Eurasian Waterbird Agreement (AEWA). Given the  
121 limited data availability and geographic gaps in information, we adopted a modelling approach. The  
122 model outputs are translated into maps that detail potential and likely areas of IFC PS6 critical  
123 habitat in the Arctic. These maps can improve conservation by supporting risk assessments for  
124 potential developments, identify likely impacts and consider mitigation options.

## 125 MATERIALS AND METHODS

### 126 Species selection

127 We analysed five Anatidae species: White-fronted Goose *Anser albifrons*, Lesser White-fronted  
128 Goose *Anser erythropus*, Brent Goose *Branta bernicla*, Redbreasted Goose *Branta ruficollis* and  
129 Bewick's Swan *Cygnus columbianus bewicki*. These all have populations that breed exclusively in the  
130 Russian Arctic and were considered likely to trigger criteria 1 or 3 of PS6, based on their red list status  
131 or occurrence in large enough concentrations, respectively.

### 132 Model

133 To produce detailed species distribution maps that could serve as a basis for critical habitat maps we  
134 used MaxEnt (Phillips, Dudík & Schapire 2004). The maps output by the model predict the suitability  
135 of habitat in the study area. The model has been used widely in the scientific community for a variety  
136 of species across a wide spectrum of habitats (Elith *et al.* 2006; Phillips & Dudik 2008; Edrén *et al.*  
137 2010).

### 138 Species occurrence

139 Species occurrence samples were obtained from online databases, telemetric studies, regional  
140 surveys and literature sources. To exclude data on vagrant birds, or otherwise unrepresentative data,  
141 only samples from within the known range of a species were used. The large distances migratory  
142 waterbirds cover during migration means that they use very different habitats during different life  
143 cycle stages, including breeding, moulting, migration and wintering. Combining these life cycle stages  
144 into a single model would lead to an overprediction of suitable habitats. The data were therefore  
145 filtered by date and location, specific for each species, so that only the breeding season samples  
146 remained (see Fig. S1 in Supporting Information). Breeding season samples may include moulting for  
147 some species, when moulting happens at the same location. As such, samples were principally  
148 categorized as breeding or breeding/moulting.

149 Especially when using samples from online databases, such as the Global Biodiversity Information  
150 Facility (GBIF), filtering the data (as described above) is an essential step. To illustrate this, none of  
151 the 448 occurrence samples of *B. ruficollis* in the GBIF from June, July or August fall within the known  
152 breeding range of the species and are likely observations of escaped captive birds and vagrants. To  
153 address IFC PS6 Criterion 3, it was also considered important to distinguish whether a species  
154 congregates during a particular life cycle stage, as is often the case during migration and moulting,  
155 and sometimes also during breeding.

156 **Telemetry data:** while telemetry data provide occurrence samples that represent true and relatively  
157 accurate occurrences of individuals, these data may not be representative of the full population  
158 because of the limited number of individuals equipped with transmitters. By design, these samples  
159 are also highly autocorrelated; that is, every successive sample is inherently close to the preceding  
160 sample, both in time and space. Since MaxEnt assumes a random distribution of occurrence samples,  
161 this affects the model quality (Phillips *et al.* 2009). As demonstrated by (Fourcade *et al.* 2014),  
162 applying a spatial filter is a relatively good, and is the most consistently performing, method to  
163 mitigate the effects of sample bias. In addition, the use of multiple data sources mitigated the effects  
164 of the potentially unrepresentative telemetry-based samples.

## 165 **Environmental predictors**

166 Environmental predictors were selected that would potentially influence the species' distributions,  
167 were available and were of consistent quality across the entire study area. Selected environmental  
168 predictors included bio-climatic variables, distances to different types of waterbodies, elevation, soil-  
169 related variables and land cover data (see Table S1 in Supporting Information). To prevent distortion  
170 of the model by decreasing raster cell size at higher latitudes (Elith *et al.* 2011), all predictors were  
171 harmonised in a GIS by re-projecting to an equal area projection (the North Pole Lambert Azimuthal  
172 Equal Area; EPSG: 102017) at a 1 km resolution.



173 Although many environmental predictors were readily available from the literature or online  
174 databases, some environmental predictors, expected to be of ecological significance to each of the  
175 species, were produced (distances to coast, freshwater, estuary and shallow coastal flats, slope,  
176 terrain roughness and dominant soil type; see below). Because of the different sources of data, the  
177 exact extent (generally the coastline), of each produced environmental predictor was not consistent,  
178 so the extent of the bio-climatic variables was used as a reference.

179 **Distance to coast:** This predictor was created by measuring the “Euclidian distance” to sea, using a  
180 bioclim predictor as reference for the coastline.

181 **Distance to freshwater:** this was based on the 250 m MODIS Water Mask data set (Carroll *et al.*  
182 2009) with the sea masked out using the “no data” zone of a bioclim predictor. The “Euclidian  
183 distance” tool was used to calculate the distance between each cell in the study area and the nearest  
184 cell with freshwater.

185 **Distance to estuary:** although there is a Global Estuary Database (Alder 2003), this was considered  
186 too coarse, with many medium to small estuaries omitted. Therefore, the lowest sub-basin polygon  
187 was selected from the HydroBASINS level 10 data set (Lehner & Grill 2013), for each basin larger than  
188 500 km<sup>2</sup>. This minimum basin size threshold was set to avoid the selection of every coastal polygon.  
189 The “Euclidian distance” was then calculated between each cell in the study area and the nearest  
190 estuary.

191 **Distance to shallow coastal flats:** shallow coastal flats function as feeding grounds for many waders,  
192 (sea-) ducks and geese. The International Bathymetric Chart of the Arctic Ocean (Jakobsson *et al.*  
193 2012) was used and the shallow areas at sea (experimentally determined between +1 m and -1 m)  
194 were selected. Within these shallow areas a sub-selection was made of all the areas that had a slope  
195 less than 0,002. From this subset only areas of at least 10 km<sup>2</sup> were selected. The “Euclidian  
196 distance” tool was used to calculate the distance between each cell in the study area and the nearest  
197 shallow coastal flat.

198 **Slope:** this was calculated from the BIOCLIM digital elevation model.

199 **Terrain roughness:** the standard deviation predictor of the 30 arc-seconds USGS Global Multi-  
200 resolution Terrain Elevation Data (GMTED2010) (Danielson & Gesch 2011) was used as a proxy for  
201 terrain roughness. A “rough” area has large fluctuations in height and therefore a large standard  
202 deviation of elevation, whereas flat areas have a low standard deviation.

203 **Dominant Soil Type:** this predictor was based on the International Soil Reference and Information  
204 Centre’s 1 km soilgrid data set (Hengl *et al.* 2014). Unfortunately, this predictor had data gaps for  
205 areas covered with seawater and freshwater, as well as permanent snow and ice cover. These gaps  
206 were partially filled using freshwater pixels from 250m MODIS Water Mask.

### 207 *Correlation analysis*

208 Although MaxEnt is relatively robust to correlated predictors (Elith *et al.* 2011), removing them does  
209 tend to improve the model (Elith & Leathwick 2009). Therefore, R was used to conduct pairwise  
210 assessments of the correlations between the environmental predictors (Table S2). Because not all  
211 predictors had a normal distribution, Spearman’s rank correlation coefficients between each possible  
212 combination of predictors based on 100,000 random locations were calculated.

### 213 *Test model runs*

214 Test models were run using the quality assessed and spatially filtered occurrence samples and all  
215 environmental predictors, to identify the most important predictors for each species model (Table  
216 S1). Predictors were ranked by their permutation importance, as an indication of unique information,  
217 and percent contribution. The highly correlated predictors, with Spearman rho values below  $-0.75$  or  
218 above  $0.75$  were removed (Table S2); this meant the predictors with the highest permutation  
219 importance were retained.

## 220 Model runs

221 MaxEnt was run with the selected environmental predictors and the following settings changed from  
222 their default: (1) 10 replicates; (2) bootstrap sampling; (3) random seed; (4) 30% random test  
223 percentage; (5) response curves; (6) jackknife procedure; (7) maximum iterations were set at 2000  
224 and 8) write background predictions.

## 225 Suitable habitat

226 One output of MaxEnt for each model run was a map, showing the average probability (of the 10  
227 replicates) of habitat suitability for each species within each raster cell; that is, a logistic value  
228 between 0 (not suitable) and 1 (very suitable) (Fig. S1). A threshold was applied to these probability  
229 maps for each species to create binary suitable/unsuitable habitat maps. The threshold was  
230 calculated using the “equal training sensitivity and specificity” method in MaxEnt, to provide a  
231 balance between the omission and commission errors.

## 232 Critical habitat

233 This study applied the criteria from the IFC PS6 Guidance Notes using a rules based approach (Table  
234 1) to classify critical habitat from the maps showing suitable habitats. These rules were derived from  
235 IFC PS6 criteria 1 and 3. In areas other than the Arctic, or for species groups other than waterbirds,  
236 criterion 2 (on endemic or restricted range species) might also be applicable.

237 The classification for critical habitat followed that of Martin (Martin *et al.* 2015) and distinguished  
238 between “potential” and “likely” critical habitat, based on relevance and certainty, indicating the  
239 difference between *modelled* critical habitat and that *confirmed* by literature or other sources.

240 **Likely critical habitat:** Independently from the modelling study, for each species and life cycle stage,  
241 areas that would qualify as critical habitat under IFC PS6 were identified through a review of the  
242 literature (Krivenko 2000);(Ramsar Convention);(Arctic and Antarctic Research Institute), from IBA  
243 information (Birdlife International) and from the Critical Site Network Tool (Wings Over Wetlands

244 2011). Under PS6 criteria an area qualifies as critical habitat if it regularly supports 1% of a migratory  
245 species' population. The areas known to support >1% of a population were therefore classified as  
246 "likely critical habitat" and also served as input data for the next step, in which the threshold value  
247 for "potential critical habitat" was determined.

248 **Potential critical habitat:** The threshold value used to identify the "suitable habitat" for a species  
249 (see above) was based on statistical, rather than ecological, considerations. The "suitable habitat"  
250 had quite a large range of probability values; that is, from 0.16 for the "least probable suitable  
251 habitat" to 0.92 for the "most probable suitable habitat". To parameterize IFC PS6 criterion 3 and  
252 identify "potential critical habitat", the habitat that was suitable enough as well as large enough to  
253 support congregations of >1% of a species' population was identified; that is, habitat that was (1)  
254 more suitable than the average habitat suitability of known key areas; and (2) larger than the typical  
255 size of known key areas was identified. For this, the key areas identified as likely critical habitat were  
256 overlaid with the probability map and then: (1) the average probability value of the suitable habitat  
257 within the key areas was calculated; and (2) the median size of the suitable habitat within the key  
258 areas was calculated. For (2), the median was preferred over the average, because of the small  
259 sample size and to minimize the effect of extreme values. The raster was then resampled from the  
260 original 1-km resolution grid, using the square root of the median of the suitable habitat area in the  
261 known key areas, to identify suitable habitat of sufficient size. The average probability value  
262 calculated in step (1) was then used as the threshold to identify the potential critical habitat on the  
263 resampled raster. Thus, the resulting maps identified habitats with a relatively high probability of  
264 meeting PS6 criteria for critical habitat, based on their suitability and size.

265

## 266 Validation

267 As demonstrated by Termansen (Termansen, McClean & Preston 2006) and Lobo (Lobo, Jiménez-  
268 valverde & Real 2008), measuring model accuracy solely from the often used "Area Under Curve"

269 (AUC) values may be misleading. Therefore, to further validate our results, we used the “True Skill  
270 Statistic” (TSS) (Allouche, Tsoar & Kadmon 2006) and additionally also list the sensitivity and  
271 specificity. These scores are based on the 30% random test percentage of the species occurrence  
272 samples. In addition the maps were validated during expert reviews conducted by the relevant  
273 Wetlands International expert groups.

## 274 RESULTS

### 275 Overview

276 A total of xxx species occurrence samples were collected and, after spatial filtering, 740 were used,  
277 with a minimum of 90 samples per species model (Table 2; Fig. 1). There were a limited number of  
278 samples in the east of the study site. The AUC score for all models was >0.9 and, importantly, the  
279 sensitivity, specificity and TSS scores were also good to very good (Table 3). A total of 1,767,749 km<sup>2</sup>  
280 within the study area was identified as potential critical habitat from a total of 4,599,512 km<sup>2</sup>  
281 identified as suitable habitat (Tables 1 & 4). 95% of the potential critical habitat and 96% of the other  
282 areas of suitable habitat were outside the boundaries of areas *known* to hold 1% of the species  
283 (Table 4; Figs 2 & 3).

### 284 *Anser albifrons*

285 As one of the most common geese in the Russian arctic, *A. albifrons* had a high number of occurrence  
286 records across most of its known range (Fig. 4a), although fewer occurrence points were available for  
287 the populations that occur east of the Taimyr. The model predicted suitable breeding habitat for  
288 large concentrations across much of the known breeding range (Wings Over Wetlands Project 2010)  
289 and 13 of the 15 known important areas for the species (Fig. 4b). The two areas that were not  
290 predicted to have suitable breeding habitat were in the far east of the study area. A total of 21 areas  
291 of potential critical habitat were identified, of which 11 overlapped with known critical habitat. Many  
292 of the newly identified areas were also between or adjacent to known critical habitat areas, such as  
293 along the coast of Baydaratskaya Guba, although 3 new areas were identified in Nova Zembya.

### 294 *Anser erythropus*

295 *A. erythropus* had the fewest number of occurrence records (90) in the study. No occurrence points  
296 were available for the most easterly population known, which is located in Central and Eastern  
297 Siberia (Fig. 5a). Additionally, the populations of *A. erythropus* that breed in Russia have declined  
298 rapidly (BirdLife 2015 XX1), which may affect the representativeness of the historical samples. Large  
299 areas outside of the known breeding range (Wings Over Wetlands Project 2010) were predicted as

300 potential critical habitat, especially in the Yamal and Yugorskiy Peninsulas (Fig. 5b). Conversely, only  
301 one known key area in the Taimyr was identified as potential critical habitat, although the area  
302 predicted as suitable in the Taimyr closely matched the known breeding range.

### 303 *Branta bernicla*

304 This species breeds and moults close to the coast in the arctic tundra or islands (BirdLife 2015 XX2).  
305 Fewer occurrence samples (116) were available for this species than most of the others studied, with  
306 most records spread across the central part of the species' breeding range (Fig. 6a). Areas between  
307 the eastern Taimyr and Lena Delta, Nova Zembya, and the far west of the study area were under-  
308 represented. Consequently, four of the most westerly sites, identified as known key areas, were not  
309 predicted as suitable, although these areas were peripheral or outside of the breeding range maps of  
310 the species (Fig. 6b) (Wings Over Wetlands Project 2010). In addition, three known important areas  
311 in the eastern part of the study area were not identified as suitable. However, nine areas were  
312 identified as new potential critical habitat in the islands to the far north, including Bolshevik Island,  
313 and a number of areas along the West Taimyr coast, up to the Yamal Peninsula.

### 314 *Branta ruficollis*

315 *B. ruficollis* has the smallest population size of the species studied (Table X) and its breeding range is  
316 restricted to areas in the Taimyr, Gydan and Yamal Peninsulas (BirdLife 2015 XX3). The species'  
317 distribution was modelled from 210 occurrence samples (Fig. 7a), mostly from the Taimyr, where an  
318 estimated 70% of the population breeds (BirdLife 2015 XX3). In total, 11 known key areas were not  
319 identified as potential critical habitat by the species model (Fig. 7b); however, many of these areas  
320 were outside or on the very edge of the reported breeding range of the species (Wings Over  
321 Wetlands Project 2010). In addition, large new areas were predicted as potential critical habitat  
322 within the breeding range, mainly located in the Taimyr and parts of the Yamal Peninsula.

### 323 *Cygnus columbianus bewickii*

324 Occurrence samples for this species were predominantly from the Western Siberia and North-  
325 East/North-West Europe population, with far fewer samples from the Northern Siberia/Caspian and

326 Asian populations (Wetlands International 2012), which breed in the Taimyr and to its east, up to the  
327 Lena Delta (Fig. 8a). Consequently, known key areas in the eastern portion of the study area were not  
328 identified as potential critical habitat, even though large parts of the Lena Delta were identified as  
329 suitable habitat (Fig. 8b). The known key areas in the west were identified as potential critical  
330 habitat, with the exception of areas in the south of the Yamal Peninsula, which is on the periphery of  
331 the Western Siberia and North-East/North-West Europe population range (Wings Over Wetlands  
332 Project 2010). New potential critical habitat was also identified in the southern part of Nova  
333 Zemblya, which is in accordance with the breeding range of the species (Wings Over Wetlands  
334 Project 2010)

## 335 DISCUSSION

336 Identifying suitable habitat through species using modeling methods is a long-standing and verified  
337 approach (Ref.) and can provide a powerful tool particularly in regions that are remote and data  
338 poor. We used the MaxEnt model to identify suitable habitats for congregations of five Anatidae  
339 species to be used for risk assessment purposes. The results are in broad agreement with the known  
340 breeding ranges of the species. About 95% of the potential critical habitat identified was outside  
341 known critical (?) areas, indicating that there are large areas in the Arctic which are potentially  
342 important for each of the species modelled. The current population size of the species may have a  
343 strong influence on the areas that are currently being favoured for breeding by a species, particularly  
344 in congregatory Anatidae. As a result, it may be expected that for those species with currently  
345 depressed populations (as compared to higher historic populations), the areas that are currently  
346 being utilised are considerably smaller than the overall suitable habitat available for a species in this  
347 part of the arctic. Therefore, it may seem there are some cases in our study where the species'  
348 distributions may appear to have been overpredicted. For example, *B. ruficollis* has a known  
349 population of only 55,000 (Wetlands International 2015). However the species is unlikely to occupy  
350 this entire area at the same time. Also, a key factor that determines *B. ruficollis* breeding areas is the



351 presence of raptors (Prop & Quinn 2003); however, this environmental variable was not included in  
352 this study, which may have influenced the results. Nevertheless, for a risk assessment the results are  
353 valuable to identify areas where the species may be present, especially as *B. ruficollis* is listed as a  
354 Vulnerable species on the IUCN Red List. In addition, for risk assessments it is arguably better to  
355 predict false positives, rather than false negatives.

356 Another reason for the mismatch may be that known critical habitat areas need further verification.

357

358 Our study has only focused occurrence data from the breeding and moulting seasons of these  
359 species. Extending this approach to other crucial life cycle stages, particularly the pre-breeding  
360 (northward) and post breeding (southward) migration periods, when birds may congregate and  
361 require different habitats across the breadth of the arctic should provide an important basis for initial  
362 risk assessments of potential developments in these areas too.

363 The accuracy of occurrence points is vital for the model results, and as many of the occurrence  
364 records used were based on telemetry data or highly accurate survey techniques, this should enable  
365 overall positive results. However there were large areas that were not predicted as suitable within  
366 the overall known breeding ranges of the species. This could be a result of small population sizes of  
367 species, as mentioned above, differences in the habitat preferences across their range or insufficient  
368 data (occurrence samples) in the particular areas. The latter reason could particularly have affected  
369 species occupying the eastern part of the study area, where occurrence records were scarce.

370

371 Following the IFC PS6 Guidance Notes, we attempted to identify habitat that was not only suitable  
372 for congregations of waterbirds or endangered species, but also critical. Converting species modelled  
373 suitability into critical habitat has no precedence in the scientific literature and our approach can be  
374 considered highly conservative. By identifying new critical habitat using the median area and average

375 probability of habitat identified as suitable in known critical habitats, we automatically set a  
376 threshold for potential critical habitat that would exclude half of the known critical habitat areas.

377 As a result, risk assessors should remain cautious of important areas that were not identified through  
378 the modelling process. We advise that any area predicted to be suitable for each species is surveyed  
379 in more detail, with particular attention to the areas predicted to be potentially critical.

380 While populations of bird species are known to vary over decades, nearly all five species are declining  
381 due to changes and pressures in the arctic and along their entire migration cycles. Furthermore,  
382 habitats across the arctic remains a highly dynamic state and are being greatly influenced by past and  
383 ongoing natural and human induced changes within the region as well as elsewhere in the world. For  
384 these reasons, the potential and likely critical habitats for these species and others may be expected  
385 to change too. Over the medium term, identification of likely impacts and of mitigation options for  
386 development activities will require periodic reassessments to be undertaken based on latest  
387 information on species concentrations and habitat use preferences as well as environmental  
388 predictors.

## 389 ACKNOWLEDGEMENTS

390 This research was carried out with the financial support of Royal Dutch Shell. The authors wish to  
391 thank Leon Bennun and John Pilgrim (Biodiversity Consultancy), and Szabolcs Nagy (Wetlands  
392 International) for their valuable and constructive inputs. This research would not have been possible  
393 without the International Wader Study Group (Arctic Birds Breeding Conditions Survey), Goose  
394 Specialist Group, Swan Specialist Group and data contributors, or reviewers, including: Georg  
395 Bangjord, - Tom Barry, - David Boertmann, Stuart Butchart; Preben Clausen, Peter Cranswick,  
396 Guttorm N. Christensen, Mindaugas Dagys, Sergey Dereliev; Tim Dodman, Garry Donaldson, Bart  
397 Ebbinge; Anthony David Fox, , Tony Fox, Gwen Fox, Peter Glazov, Larry Griffin, Gudmundur A.  
398 Gudmundsson, Ward Hagemeyer, Richard Hearn, Tom Ingunn, Sergei Kharitonov, Tyler Kydd,  
399 Kees Koffijberg, Richard Lanctot, Elena Lebedeva-Hooft, Jesper Madsen, Nina Mikander, Gerard  
400 Muskens, Valentin Ilyashenko, David Boertmann, Anders Mosbech, Hans Meltofte, Leif Nilsson, Ib  
401 Krag Petersen, Nicky Petkov, Peter Prokosh, Jouke Prop, Diana Solovyeva, Kristinn H Skarphéðinsson,  
402 David Stroud, Evgeny Syroechkovsky, Tero Toivanen, Yvonne Verkuil, Doug Watkins, Hannah  
403 Wauchope, Martin Wikelski, and Ramunas Zydalis. In addition, we appreciate telemetry work  
404 included in our analyses that was originally undertaken with support from the Akvaplan-niva, The  
405 Arctic Centre, Fund King Leopold III of Belgium for the Exploration and Conservation of Nature,  
406 Norwegian Polar Institute, Norwegian Institute for Nature Research (NINA), University of Groningen,  
407 The Governor of Svalbard, The British Schools Exploring Society, and The Norwegian Biodiversity  
408 Information Centre.

## 409 DATA ACCESSIBILITY

- 410 1. MaxEnt scripts and R scripts are included in Appendix S1.
- 411 2. MaxEnt model (5x)
- 412 3. GeoTIFF rasters probability (5x)
- 413 4. Shapefiles
  - 414 a. Likely Critical Habitat
  - 415 b. Potential Critical Habitat

## 416 REFERENCES

- 417 Note - Duan, R., Kong, X., Huang, M., Fan, W. & Wang, Z. (2014) appears incomplete
- 418 Add CAFF 2013, ABA.
- 419 (Arctic and Antarctic Research Institute). Protected areas map of Russia,  
420 [http://oopt.aari.ru/oopt\\_map](http://oopt.aari.ru/oopt_map)
- 421 (Birdlife International). Birdlife Data Zone, <http://www.birdlife.org/datazone/site>
- 422 (Ramsar Convention). Ramsar Sites Information Service, <https://rsis.ramsar.org/>
- 423 Alder, J. (2003) Putting the coast in the "Sea Around Us" project. , 1.
- 424 Allouche, O., Tsoar, A. & Kadmon, R. (2006) Assessing the accuracy of species distribution models:  
425 Prevalence, kappa and the true skill statistic (TSS). *Journal of Applied Ecology*, **43**, 1223–1232.
- 426 Arino, O., Ramos Perez, J.J., Kalogirou, V., Bontemps, S., Defourny, P. & Van Bogaert, E. (2012) Global  
427 Land Cover Map for 2009 (GlobCover 2009).
- 428 Carroll, M.L., Townshend, J.R., DiMiceli, C.M., Noojipady, P. & Sohlberg, R.A. (2009) A new global  
429 raster water mask at 250 m resolution. *International Journal of Digital Earth*, **2**, 291–308.
- 430 Danielson, J.J. & Gesch, D.B. (2011) *Global Multi-Resolution Terrain Elevation Data 2010*. Reston.
- 431 Duan, R., Kong, X., Huang, M., Fan, W. & Wang, Z. (2014) The Predictive Performance and Stability of  
432 Six Species Distribution Models. , **9**.
- 433 Edrén, S.M.C., Wisz, M.S., Teilmann, J., Dietz, R. & Söderkvist, J. (2010) Modelling spatial patterns in  
434 harbour porpoise satellite telemetry data using maximum entropy. *Ecography*, **33**, 698–708.
- 435 Elith, J., Graham, C.H., Anderson, R.P., Dudik, M., Ferrier, S., Guisan, a., Hijmans, R.J., Huettmann, F.,  
436 Leathwick, J.R., Lehmann, a., Li, J., Lohmann, L.G., Loiselle, B. a., Manion, G., Moritz, C.,  
437 Nakamura, M., Nakazawa, Y., Overton, J.M.C., Peterson, a. T., Phillips, S.J., Richardson, K.,  
438 Scachetti-Pereira, R., Schapire, R.E., Soberon, J., Williams, S., Wisz, M.S. & Zimmermann, N.E.  
439 (2006) Novel methods improve prediction of species' distributions from occurrence data. M.  
440 *ECography*, **29**, 129–151.
- 441 Elith, J. & Leathwick, J.R. (2009) Species Distribution Models: Ecological Explanation and Prediction  
442 Across Space and Time. *Annual Review of Ecology, Evolution, and Systematics*, **40**, 677–697.
- 443 Elith, J., Phillips, S., Hastie, T., Dud, M., Chee, Y.E., Yates, C., Avenue, P., Park, F., York, N. & Division, S.  
444 (2011) A statistical explanation of MaxEnt for ecologists. *Environment*, 1–28.
- 445 Fourcade, Y., Engler, J.O., Rödder, D. & Secondi, J. (2014) Mapping species distributions with MAXENT  
446 using a geographically biased sample of presence data: A performance assessment of methods  
447 for correcting sampling bias. *PLoS ONE*, **9**.
- 448 Hengl, T., de Jesus, J.M., MacMillan, R.A., Batjes, N.H., Heuvelink, G.B.M., Ribeiro, E., Samuel-Rosa,  
449 A., Kempen, B., Leenaars, J.G.B., Walsh, M.G. & Gonzalez, M.R. (2014) SoilGrids1km--global soil  
450 information based on automated mapping. *PloS one*, **9**, e105992.
- 451 Hijmans, R.J., Cameron, S.E., Parra, J.L., Jones, P.G. & Jarvis, A. (2005) Very high resolution  
452 interpolated climate surfaces for global land areas. *International Journal of Climatology*, **25**,  
453 1965–1978.
- 454 IFC. (2012a) Performance Standard 6: Biodiversity Conservation and Sustainable Management of  
455 Living Natural Resources. , 7.
- 456 IFC. (2012b) Guidance Note 6 Biodiversity Conservation and Sustainable Management of Living  
457 Natural Resources. , 1–70.
- 458 Jakobsson, M., Mayer, L., Coakley, B., Dowdeswell, J.A., Forbes, S., Fridman, B., Hodnesdal, H.,

- 459 Noormets, R., Pedersen, R., Rebesco, M., Schenke, H.W., Zarayskaya, Y., Accettella, D.,  
460 Armstrong, A., Anderson, R.M., Bienhoff, P., Camerlenghi, A., Chruch, I., Edwards, M., Gardner,  
461 J. V., Hall, J.K., Hell, B., Hestvik, O., Kristoffersen, Y., Marcussen, C., Mohammad, R., Mosher, D.,  
462 Nghiem, S. V., Pedrosa, M.T., G, T.P. & Weatherall, P. (2012) The International Bathymetric Chart  
463 of the Arctic Ocean (IBCAO) Version 3.0. *Geophysical Research Letters*, **39**.
- 464 Krivenko, V.G. (2000) *Wetlands in Russia, Volume 3: Wetlands on the Ramsar Shadow List* (eds V.E.  
465 Flint, V.Y. Iliashenko, I.E. Kamennova, L.B. Kholopova, A.L. Mischenko, V.A. Orlov, & V.G.  
466 Vinogradov). Wetlands International.
- 467 Lehner, B. & Grill, G. (2013) Global river hydrography and network routing: baseline data and new  
468 approaches to study the world's large river systems. *Hydrological Processes*, **27**, 2171–2186.
- 469 Lobo, J.M., Jiménez-valverde, A. & Real, R. (2008) AUC: A misleading measure of the performance of  
470 predictive distribution models. *Global Ecology and Biogeography*, **17**, 145–151.
- 471 Martin, C.S., Tolley, M.J., Farmer, L.E., McOwen, C., Geffert, J.L., Scharlemann, J.P.W., Thomas, H.L.,  
472 van Bochove, J.H., Stanwell-Smith, D., Hutton, J.M., Lascelles, B., Pilgrim, J.D., Ekstrom, J.M.M.  
473 & Tittensor, D.P. (2015) A global map to aid the identification and screening of Critical Habitat  
474 for marine industries. *in Prep*, **53**, 45–53.
- 475 Phillips, S.J. & Dudík, M. (2008) Modeling of species distributions with MaxEnt: new extensions and a  
476 comprehensive evaluation. *Ecography*, **31**, 161–175.
- 477 Phillips, S.J., Dudík, M., Elith, J., Graham, C.H., Lehmann, A., Leathwick, J. & Ferrier, S. (2009) Sample  
478 selection bias and presence-only distribution models: Implications for background and pseudo-  
479 absence data. *Ecological Applications*, **19**, 181–197.
- 480 Phillips, S., Dudík, M. & Schapire, R. (2004) A maximum entropy approach to species distribution  
481 modeling. *Proceedings of the twenty-first ...*, 655–662.
- 482 Termansen, M., McClean, C.J. & Preston, C.D. (2006) The use of genetic algorithms and Bayesian  
483 classification to model species distributions. *Ecological Modelling*, **192**, 410–424.
- 484 The IUCN Red List of Threatened Species. <http://www.iucnredlist.org/>
- 485 Wings Over Wetlands. (2011) *Conservation of Internationally Important Sites for Waterbirds in the*  
486 *African-Eurasian Waterbird Agreement Area*.
- 487 Wohl, K.D. (U. S.F. and W.S. (2006) The Arctic – origin of flyways. *Waterbirds around the world* (eds  
488 G.. Boere, C.A. Galbraith, & D.A. Stroud), p. The Stationary Office, Edinburgh.

489

490 **STILL TO DO in Mendeley: REFS FOR RESULTS and OCCURRENCE POINTS (abbcs, gbif, individual**  
491 **telemetry studies)**

492 Wings Over Wetlands Project (2010) Critical Site Network Tool. UNEP-WCMC, BirdLife International  
493 and Wetlands International, Cambridge, UK and Wageningen, The Netherlands

494 (BirdLife 2015 XX1) = BirdLife International (2015) Species factsheet: *Anser erythropus*.  
495 Downloaded from <http://www.birdlife.org> on 23/11/2015. Recommended citation for  
496 factsheets for more than one species: BirdLife International (2015) IUCN Red List for birds.  
497 Downloaded from <http://www.birdlife.org> on 23/11/2015.

498

499 (BirdLife 2015 XX2) = BirdLife International (2015) Species factsheet: *Branta bernicla*.  
500 Downloaded from <http://www.birdlife.org> on 23/11/2015. Recommended citation for

- 501 factsheets for more than one species: BirdLife International (2015) IUCN Red List for birds.  
502 Downloaded from <http://www.birdlife.org> on 23/11/2015.
- 503 "Waterbird Population Estimates" . Retrieved from [wpe.wetlands.org](http://wpe.wetlands.org) on Monday 23 Nov 2015
- 504 (BirdLife 2015 XX3) BirdLife International (2015) Species factsheet: *Branta ruficollis*.  
505 Downloaded from <http://www.birdlife.org> on 23/11/2015. Recommended citation for  
506 factsheets for more than one species: BirdLife International (2015) IUCN Red List for birds.  
507 Downloaded from <http://www.birdlife.org> on 23/11/2015.
- 508
- 509 Prop, J & Quinn J.L (2003) Constrained by available raptor hosts and islands: density-dependent  
510 reproductive success in red-breasted geese. *Oikos*, 102, 571-580.
- 511
- 512 Cranswick, P.A., Raducescu, L., Hilton G.M. & Petkov, N. 2012. International Single Species Action  
513 Plan for the Conservation of the Red-breasted Goose (*Branta ruficollis*). AEWA Technical Series No.  
514 46.
- 515
- 516 Vangeluwe D., Rozenfeld S. B., Dmitriev A. E., Bulteau V. 2012. Preliminary results from GPS tracking  
517 of Red-Breasted Geese (*Branta ruficollis*) from their Gydan peninsula (Russia) breeding grounds. —  
518 *Casarca*, 15(2): 80–93.
- 519
- 520 Jones, T., Martin, K., Barov, B., Nagy, S. (Compilers). 2008. International Single Species Action Plan for  
521 the Conservation of the Western Palearctic Population of the Lesser White-fronted Goose *Anser*  
522 *erythropus*. AEWA Technical Series No.36. Bonn, Germany.
- 523 Kokorev Y., Quinn J. L. 1999. Geese in the Pura Basin, Taimyr: their status, trends and the effects of  
524 the lemming cycle on breeding parameters. *Casarca*, 5: 272–295.
- 525
- 526 Kostin I. O., Mooij J. H. 1995. Influence of weather conditions and other factors on the reproductive  
527 cycle of the Red-breasted Geese *Branta ruficollis* on the Taymir Peninsula. — *Wildfowl*, 46: 45–54.

528 **TABLES**

529 **Table 1. Classification and justification of critical habitat based on IFC PS6**

|                                                                            | <b>No Critical Habitat expected</b> | <b>Potential High Biodiversity Value</b>                                                                                                                                                                           | <b>Potential Critical Habitat</b>                                                                                                      | <b>Likely Critical Habitat</b>                                                                           |
|----------------------------------------------------------------------------|-------------------------------------|--------------------------------------------------------------------------------------------------------------------------------------------------------------------------------------------------------------------|----------------------------------------------------------------------------------------------------------------------------------------|----------------------------------------------------------------------------------------------------------|
| <b>Criterion 1 and 3 Critically Endangered (CR) species</b>                | Not expected to be suitable         | Not applicable                                                                                                                                                                                                     | Area expected to regularly sustain $\geq 1$ individual, based on MaxEnt modelling                                                      | Area with known regular occurrence of $\geq 1$ individual                                                |
| <b>Criterion 1 and 3 Endangered (EN) species</b>                           | Not expected to be suitable         | Area expected to be suitable based on MaxEnt modelling                                                                                                                                                             | Area expected to regularly sustain $\geq 1\%$ of the biogeographic population, based on MaxEnt modelling                               | Area known to regularly sustain $\geq 1\%$ of the biogeographic population                               |
| <b>Criterion 3 Vulnerable (VU) Near Threatened (NT) Least Concern (LC)</b> | Suitable habitat                    | Area expected to be suitable during life cycle stages where species is likely to occur in concentrations of $\geq 1\%$ of the biogeographic concentration, or $\geq 20,000$ individuals, based on MaxEnt modelling | Area expected to regularly sustain $\geq 1\%$ of the biogeographic population, or $\geq 20,000$ individuals, based on MaxEnt modelling | Area known to regularly sustain $\geq 1\%$ of the biogeographic population, or $\geq 20,000$ individuals |

530

531



532

533 **Table 2. Occurrence samples of each species used**

| Species                                                 | # occurrence samples | 1% area |
|---------------------------------------------------------|----------------------|---------|
| <i>Anser albifrons</i><br>(Greater White-fronted Goose) | 176                  | 1,672   |
| <i>Anser erythropus</i><br>(Lesser White-fronted Goose) | 90                   | 499     |
| <i>Branta bernicla</i><br>(Brent Goose)                 | 116                  | 390     |
| <i>Branta ruficollis</i><br>(Red-breasted Goose)        | 210                  | 749     |
| <i>Cygnus columbianus</i><br>(Tundra Swan)              | 148                  | 623     |

534

535

536 **Table 2. Overview of species and occurrence samples used**

| Species                                                 | IUCN Conservation Status <sup>1</sup>                                                                             | Population Estimate <sup>2</sup> | # tracked individuals | # occurrence samples | 1% area |
|---------------------------------------------------------|-------------------------------------------------------------------------------------------------------------------|----------------------------------|-----------------------|----------------------|---------|
| <i>Anser albifrons</i><br>(Greater White-fronted Goose) | Least Concern (LC)                                                                                                |                                  |                       | 176                  | 1,672   |
| <i>Anser erythropus</i><br>(Lesser White-fronted Goose) | Vulnerable (VU)<br>Although the population in question is considered threatened and has been included under AEWAs |                                  |                       | 90                   | 499     |
| <i>Branta bernicla</i><br>(Brent Goose)                 |                                                                                                                   |                                  |                       | 116                  | 390     |
| <i>Branta ruficollis</i><br>(Red-breasted Goose)        | VU                                                                                                                |                                  |                       | 210                  | 749     |
| <i>Cygnus columbianus bewickii</i><br>(Tundra Swan)     | LC. Although the population is considered threatened and has been included under AEWAs Action Plan                |                                  |                       | 148                  | 623     |

537 <sup>1</sup>IUCN Red List Status (2015)

538 <sup>2</sup>Wetlands International (2012)

539

540 **Table 3. Validation of the MaxEnt models**

| Species                                                 | AUC <sup>†</sup> | Sensitivity | Specificity | TSS <sup>‡</sup> |
|---------------------------------------------------------|------------------|-------------|-------------|------------------|
| <i>Anser albifrons</i><br>(Greater White-fronted Goose) | 0.973            | 0.86        | 0.93        | 0.79             |
| <i>Anser erythropus</i><br>(Lesser White-fronted Goose) | 0.960            | 0.86        | 0.90        | 0.76             |
| <i>Branta bernicla</i><br>(Brent Goose)                 | 0.993            | 0.91        | 0.98        | 0.91             |
| <i>Branta ruficollis</i><br>(Red-breasted Goose)        | 0.968            | 0.85        | 0.92        | 0.78             |
| <i>Cygnus columbianus bewickii</i><br>(Bewick's Swan)   | 0.983            | 0.88        | 0.92        | 0.85             |

541 <sup>†</sup>Area under curve; <sup>‡</sup> True Skill Statistic

542

543 **Table 4.** Potential high biodiversity value (HBV) and potential critical habitat  
 544 (PCH) per species, and the fractions in known important areas (KIA)

| Species                                              | # KIA | PCH (km <sup>2</sup> ) | HBV (km <sup>2</sup> ) | PCH outside KIA km <sup>2</sup> (%) | HBV outside KIA km <sup>2</sup> (%) | KIA with PCH # (%) | KIA with HBV # (%) |
|------------------------------------------------------|-------|------------------------|------------------------|-------------------------------------|-------------------------------------|--------------------|--------------------|
| <b>Anser albifrons (Greater White-fronted Goose)</b> | 15    | 164,635                | 1,235,684              | 144,478 (88%)                       | 1,156,328 (94%)                     | 4 (27%)            | 13 (87%)           |
| <b>Anser erythropus (Lesser White-fronted Goose)</b> | 11    | 457,225                | 916,111                | 445,888 (98%)                       | 893,747 (98%)                       | 5 (45%)            | 8 (73%)            |
| <b>Branta bernicla (Brent Goose)</b>                 | 10    | 223,979                | 385,941                | 221,811 (99%)                       | 377,015 (98%)                       | 2 (20%)            | 5 (50%)            |
| <b>Branta ruficollis (Red-breasted Goose)</b>        | 13    | 533,249                | 1,162,723              | 516,439 (97%)                       | 1,123,013 (97%)                     | 4 (31%)            | 9 (69%)            |
| <b>Cygnus columbianus (Tundra Swan)</b>              | 11    | 135,217                | 958,341                | 115,843 (86%)                       | 908,903 (95%)                       | 3 (27%)            | 10 (91%)           |
| <b>Total distinct area</b>                           |       | <b>1,767,749</b>       | <b>4,599,512</b>       | <b>1,674,434 (95%)</b>              | <b>4,419,112 (96%)</b>              |                    |                    |

545

546 | FIGURES

547

548 **Fig. 1** Distribution of waterbird occurrence samples used (black dots)

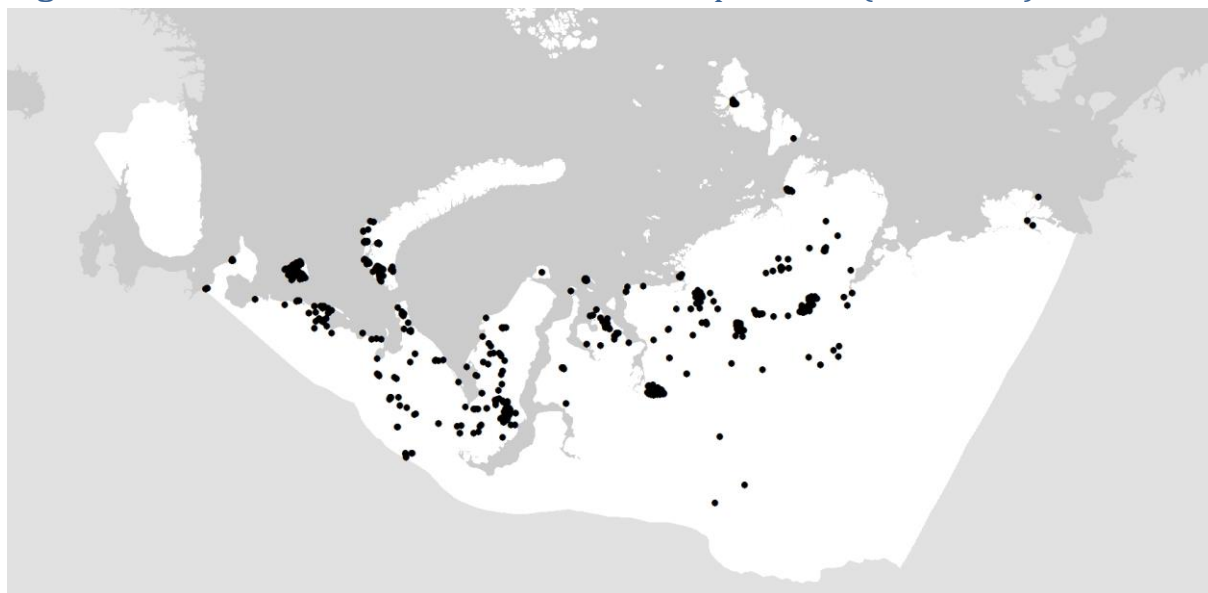

549

550

551 **Fig. 2.** Suitable habitat (dashed) and potential critical habitat (black) during the  
552 breeding season for all five species

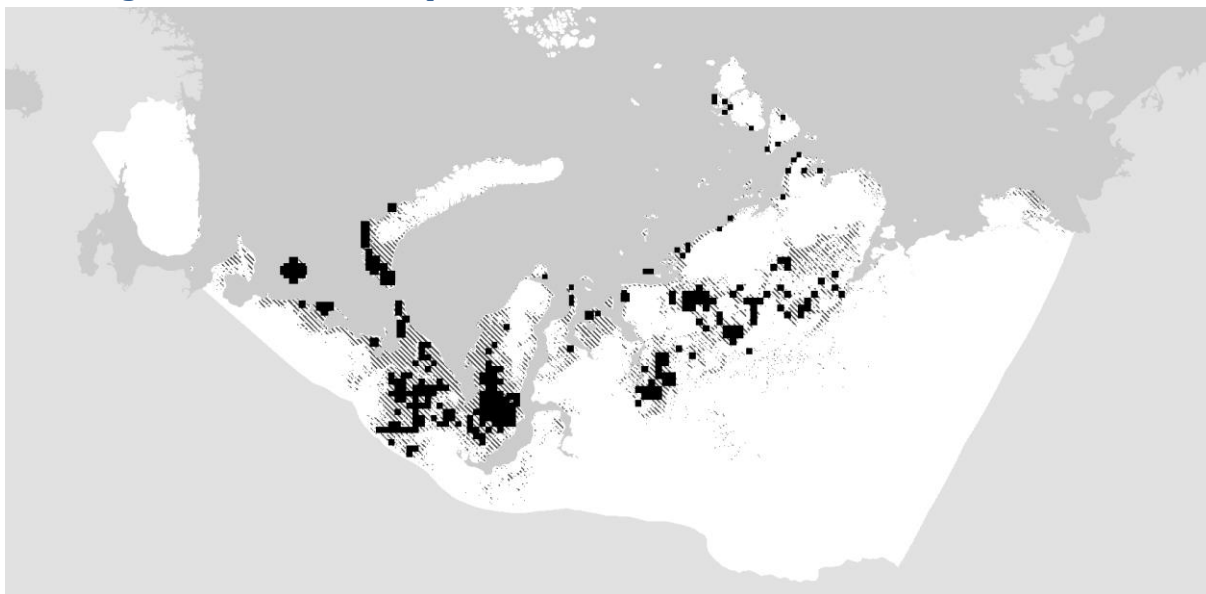

553

554

555 **Fig. 3.** Known important areas for all species  
556

557 **Fig. 4.** *Anser albifrons* (a) identified suitable habitat, and (b) likely (dashed) and  
558 potential critical habitat (black)

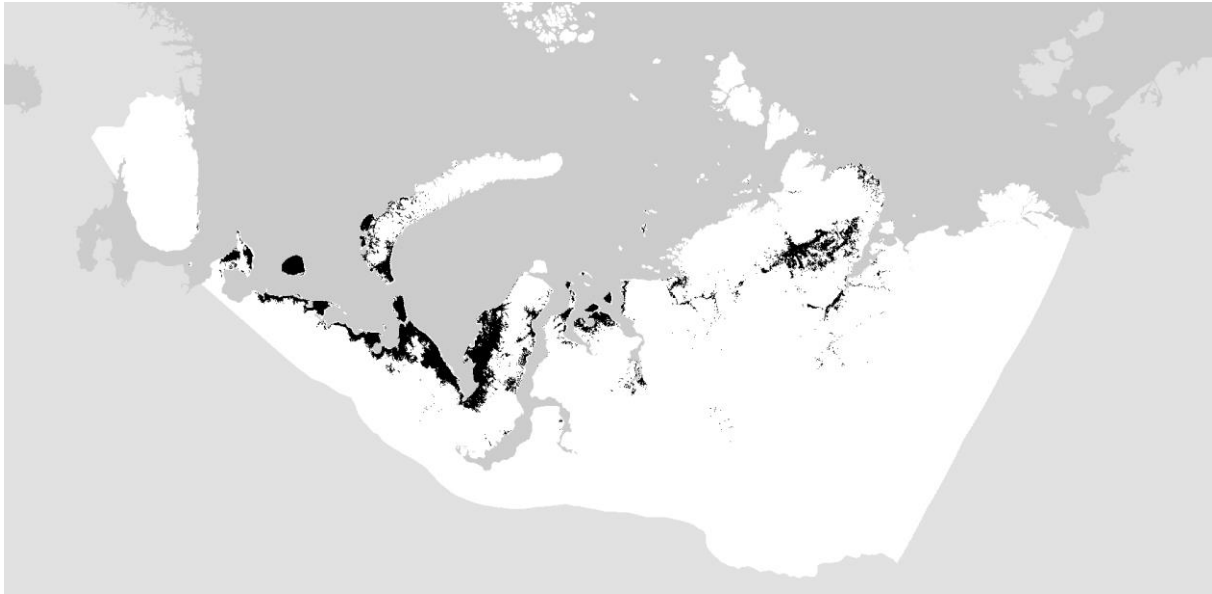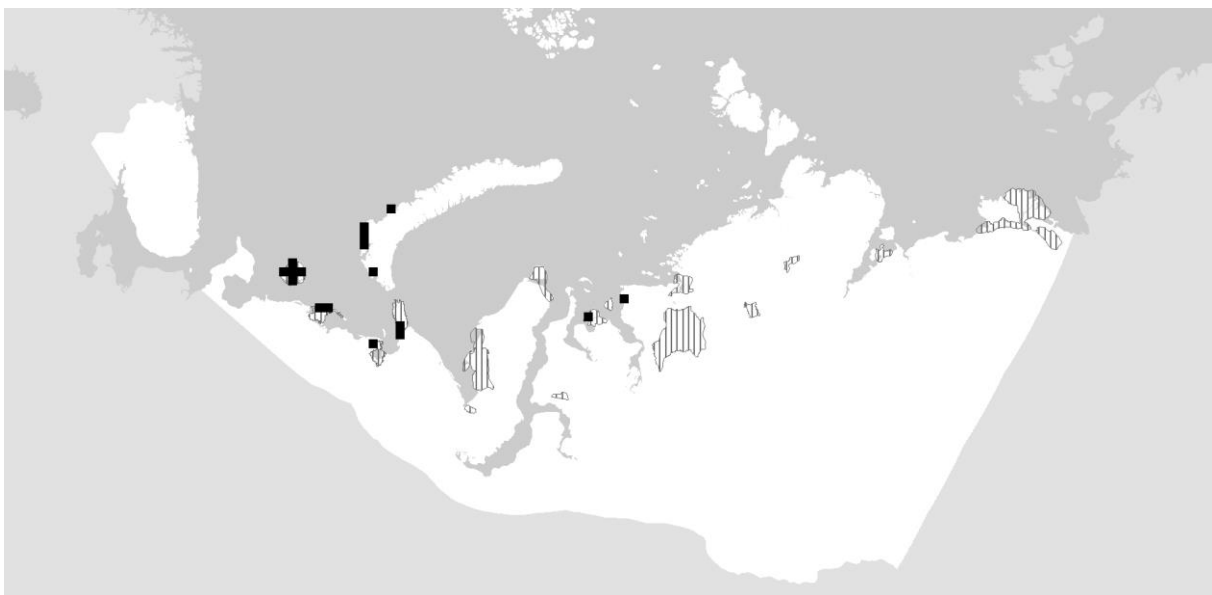

561 **Fig. 5.** *Anser erythropus* (a) identified suitable habitat, and (b) likely (dashed) and  
562 potential critical habitat (black)

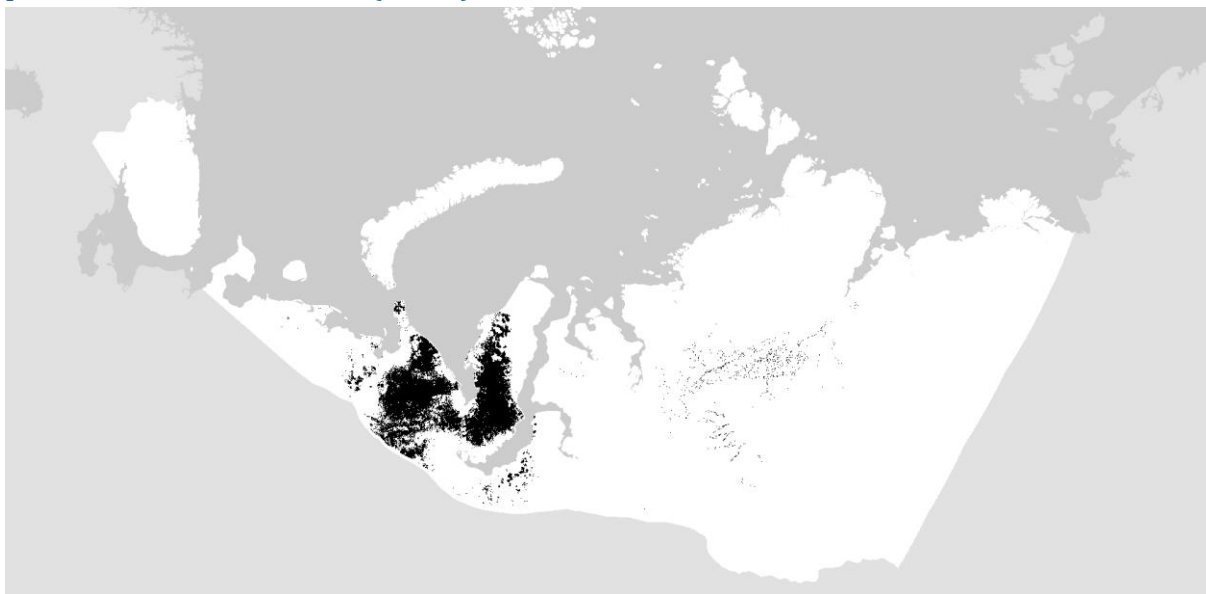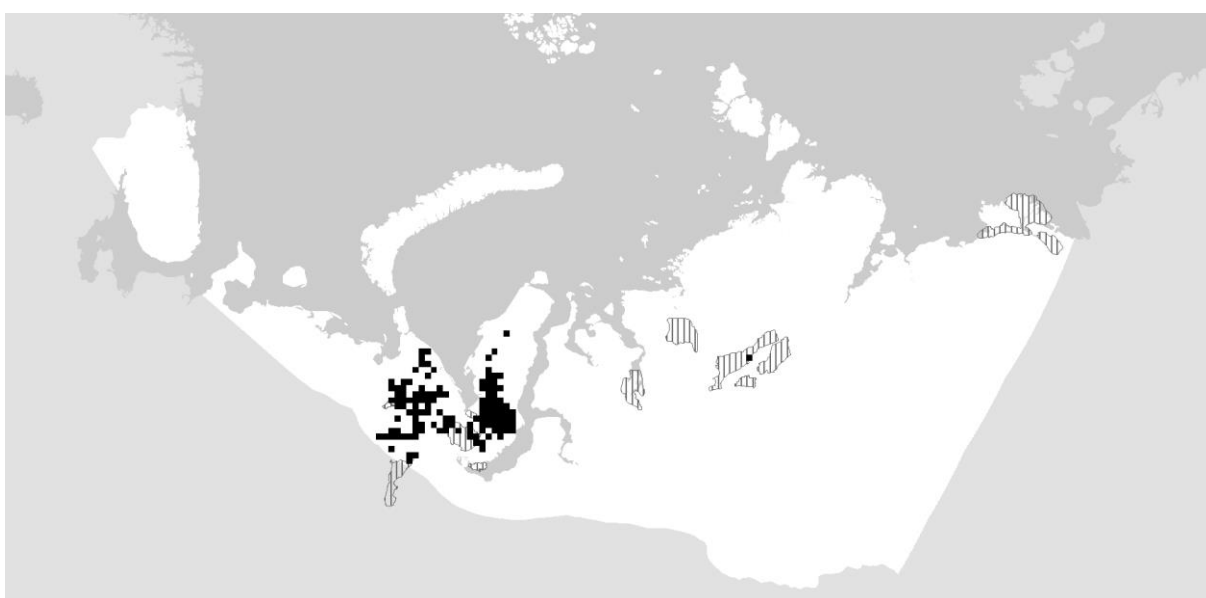



565 **Fig. 6.** *Branta bernicla* (a) identified suitable habitat, and (b) likely (dashed) and  
566 potential critical habitat (black)

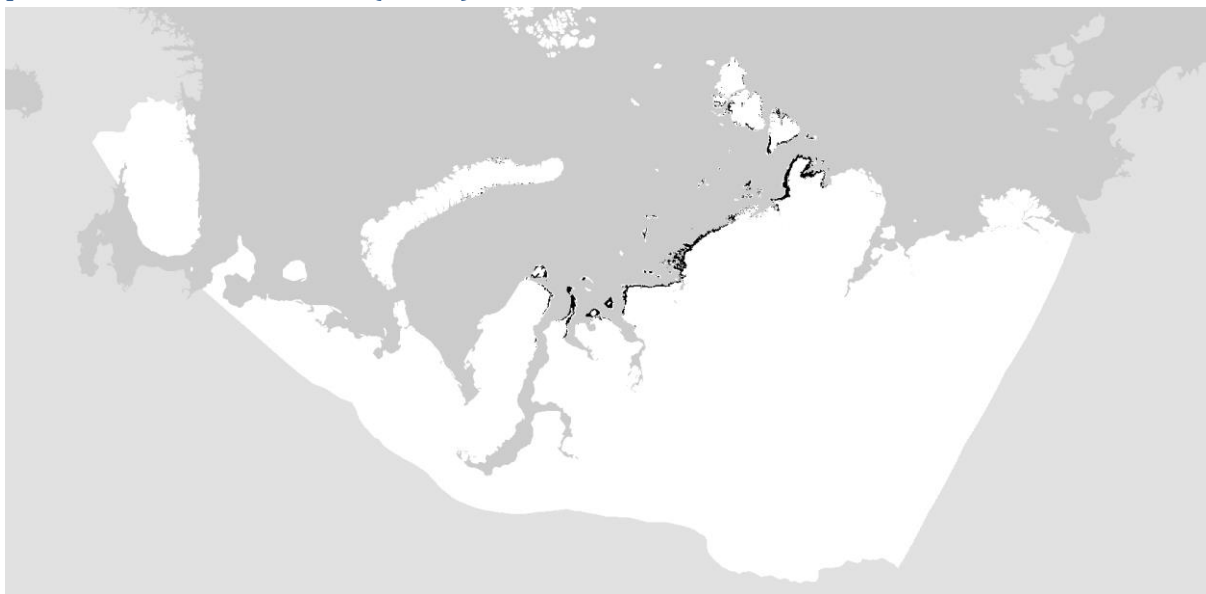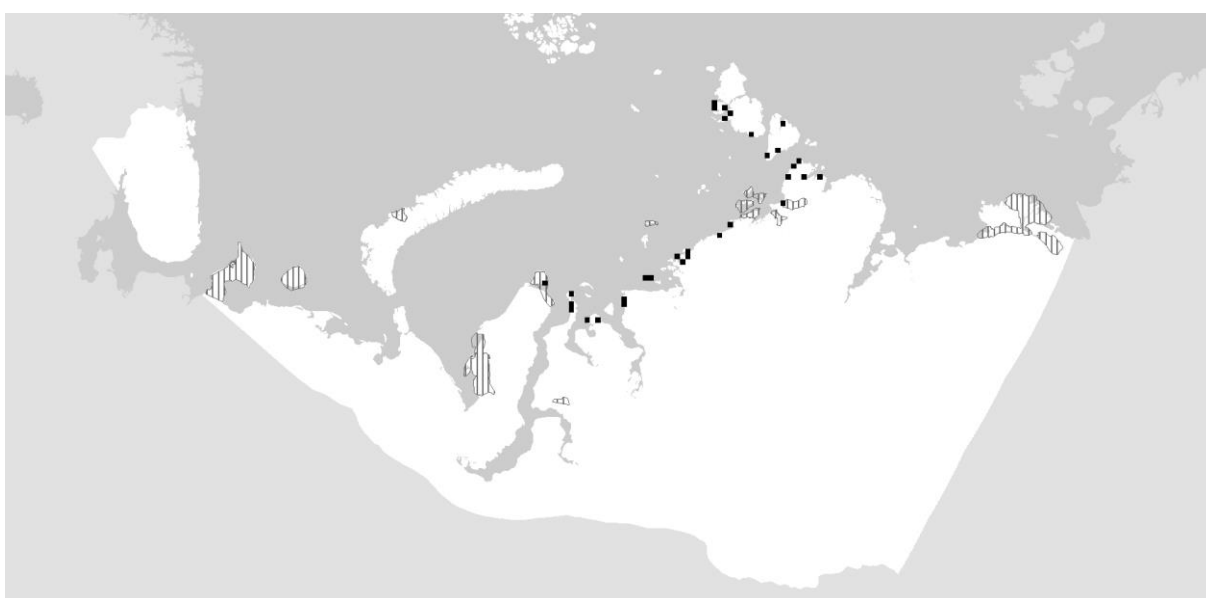

569 **Fig. 7.** *Branta ruficollis* (a) identified suitable habitat, and (b) likely (dashed) and  
570 potential critical habitat (black)

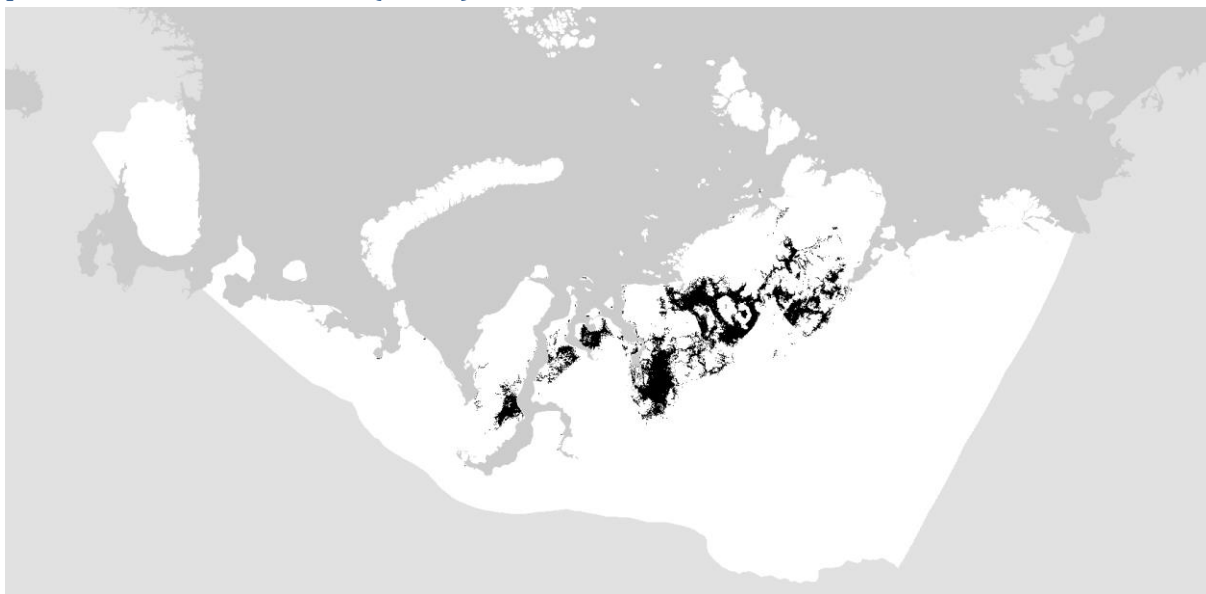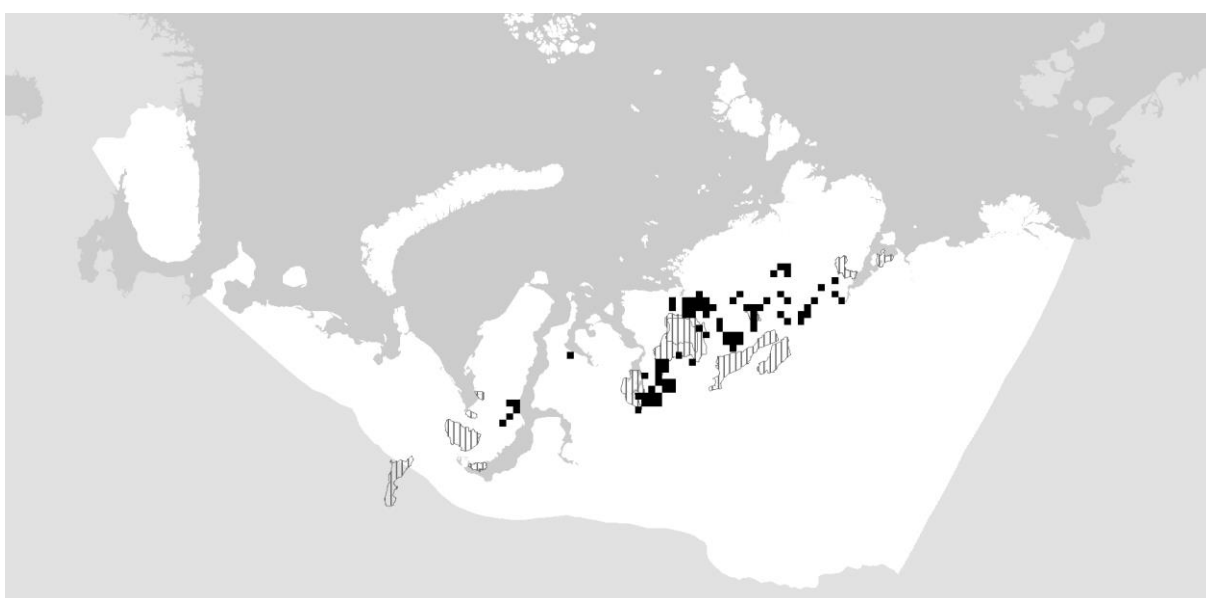

573 **Fig. 8.** *Cygnus columbianus* (a) identified suitable habitat, and (b) likely (dashed)  
574 and potential critical habitat (black)

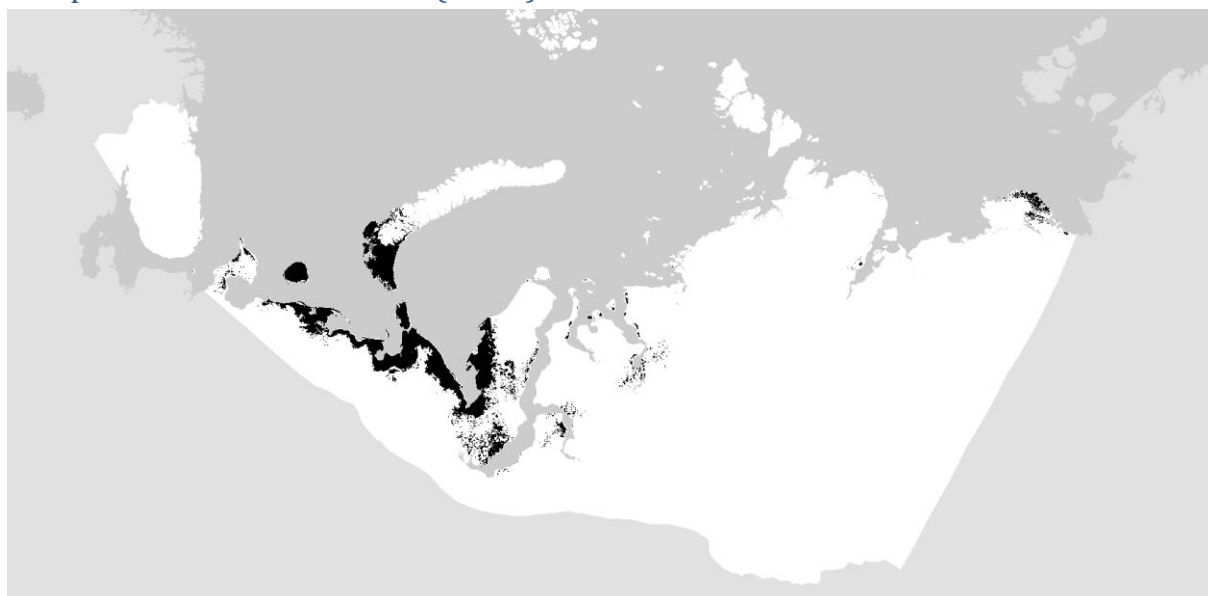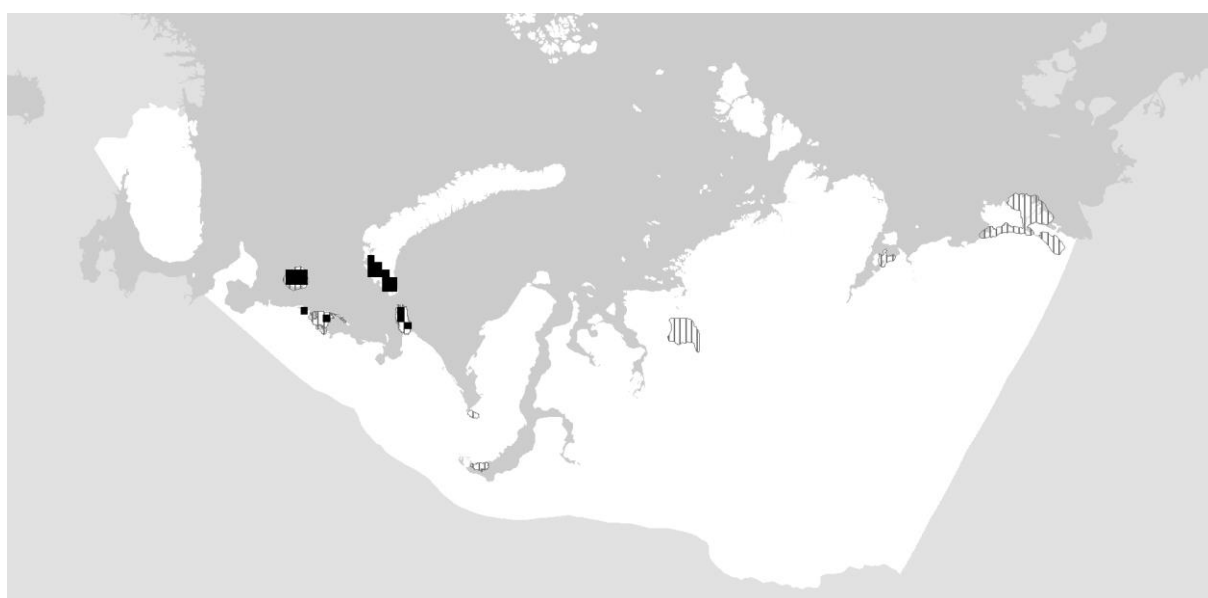

## 577 SUPPORTING INFORMATION

578 Additional Supporting Information may be found in the online version of this article:

579 Appendix S1. MaxEnt scripts and R commands used

580 Appendix S2. Supplementary tables

581           Table S1. Environmental predictors used in MaxEnt

582           Table S2. Matrix of the Spearman's correlation coefficients between the environmental  
583 layers

584           Table S3. The environmental predictors used for each model

585 Appendix S3. Supplementary figures

586           Figure S1. Methodology overview

587

## 588 *Appendix S1*

### 589 *MaxEnt script to extract random background points:*

```
590 D:\MaxEnt\EnvLayersFinal>java -cp D:\MaxEnt\maxent.jar density.tools.RandomSample 100000
591 bioclim01.asc bioclim02.asc bioclim03.asc bioclim04.asc bioclim05.asc bioclim06.asc bioclim07.asc
592 bioclim08.asc bioclim09.asc bioclim10.asc bioclim11.asc bioclim12.asc bioclim13.asc bioclim14.asc
593 bioclim15.asc bioclim16.asc bioclim17.asc bioclim18.asc bioclim19.asc dist2coast.asc dist2estuary.asc
594 dist2freshwater.asc dist2mudflat.asc elevation.asc elevation_aspect.asc elevation_slope.asc
595 elevation_std.asc globcover2009_v2.3.asc soilgwr_b_freshw.asc > 100krandomsample.swd
```

### 596 *R commands for Spearman's ranked correlations:*

```
597 sample = read.csv(file.choose(), header=T)
598 coefficients = cor(sample, method = "spearman")
599 write.csv(coefficients, file="coefficients.csv")
```

### 600 *Occurrence data sources*

```
601 abbc
602 AEWA report Yamalo-Nenetsky Autonomous Okrug
603 NOF
604 ZMO
605 telemetry
606 ArtDatabanken
607 BioFokus
608 BirdlifeFinland
609 CLO
610 DN
611 FMNH
612 iNaturalist
```

- 613 MFU
- 614 Miljøfaglig Utredning
- 615 naturgucker
- 616 NRM
- 617 miljolare
- 618 gbif
- 619 Kolguev
- 620 Mindaugas Dagys

621 Appendix S2

622 Table S1. Overview of environmental predictors

| Predictor code                         | Description                                             | Reference                    |
|----------------------------------------|---------------------------------------------------------|------------------------------|
| <i>BioClimatic variables</i>           |                                                         | (Hijmans <i>et al.</i> 2005) |
| Bioclim01                              | Annual Mean Temperature                                 |                              |
| Bioclim02                              | Mean Diurnal Range (Mean monthly (max temp - min temp)) |                              |
| Bioclim03                              | Isothermality (BIO2/BIO7) (* 100)                       |                              |
| Bioclim04                              | Temperature Seasonality (standard deviation *100)       |                              |
| Bioclim05                              | Max Temperature of Warmest Month                        |                              |
| Bioclim06                              | Min Temperature of Coldest Month                        |                              |
| Bioclim07                              | Temperature Annual Range (BIO5-BIO6)                    |                              |
| Bioclim08                              | Mean Temperature of Wettest Quarter                     |                              |
| Bioclim09                              | Mean Temperature of Driest Quarter                      |                              |
| Bioclim10                              | Mean Temperature of Warmest Quarter                     |                              |
| Bioclim11                              | Mean Temperature of Coldest Quarter                     |                              |
| Bioclim12                              | Annual Precipitation                                    |                              |
| Bioclim13                              | Precipitation of Wettest Month                          |                              |
| Bioclim14                              | Precipitation of Driest Month                           |                              |
| Bioclim15                              | Precipitation Seasonality (Coefficient of Variation)    |                              |
| Bioclim16                              | Precipitation of Wettest Quarter                        |                              |
| Bioclim17                              | Precipitation of Driest Quarter                         |                              |
| Bioclim18                              | Precipitation of Warmest Quarter                        |                              |
| Bioclim19                              | Precipitation of Coldest Quarter                        |                              |
| <i>Euclidian distances</i>             |                                                         | Derived                      |
| Dist2coast                             | Distance to nearest coast                               |                              |
| Dist2estuary                           | Distance to nearest estuary                             |                              |
| Dist2freshwater                        | Distance to nearest freshwater body                     |                              |
| Dist2shallowflatcoast                  | Distance to shallow coastal flats                       |                              |
| <i>Elevation and elevation-derived</i> |                                                         |                              |
| Elevation                              | Elevation from Bioclimatic variable                     | (Hijmans <i>et al.</i> 2005) |
| Elevation_slope                        | Elevation slope                                         | Derived                      |
| Elevation_std                          | Elevation standard deviation                            | (Danielson & Gesch 2011)     |
| <i>Others</i>                          |                                                         |                              |
| GlobCover2009_v2.3                     | Global Landcover                                        | (Arino <i>et al.</i> 2012)   |
| Soilgwrb_freshw                        | Dominant soiltype                                       | Derived                      |

623 *Table S2. Pairwise correlations of environmental layers*



624 Appendix S3. Supplementary figures

625 *Fig. S1. Overview of the method used to create the critical habitat maps*

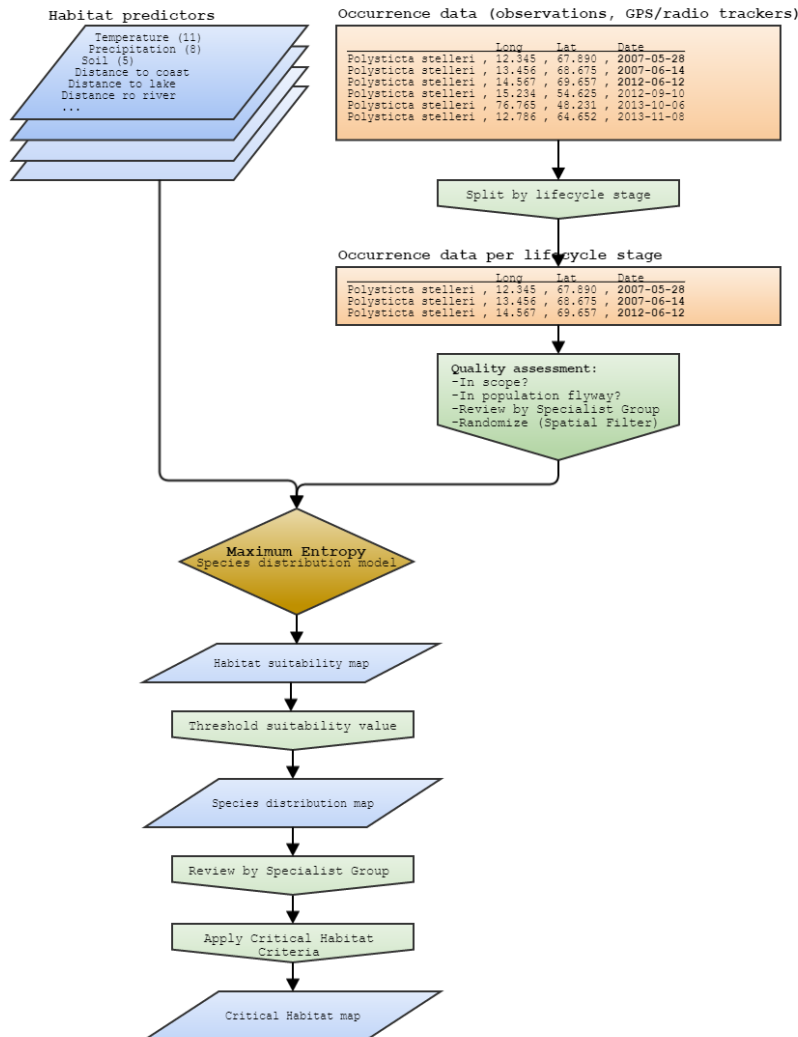

626

627
